# Supplementary material for: Bi2WO6/Ag3PO4–Ag Z-scheme heterojunction as a new plasmonic visible-light-driven photocatalyst: performance evaluation and mechanism study
Source: Royal Society of Chemistry journal article supplement (doi:10.1039/c8nj05195j), 2018-11-05
Supplement: c8nj05195j1.pdf [file c8nj05195j1.pdf]

***Bi<sub>2</sub>WO<sub>6</sub>/Ag<sub>3</sub>PO<sub>4</sub>-Ag Z-scheme heterojunction as new plasmonic visible-light-driven photocatalyst: Performance evaluation and mechanism study***

***Maryam Amiri<sup>a</sup>, Kheibar Dashtian<sup>a</sup>, Mehrorang Ghaedi<sup>a\*</sup>, Soleiman Mosleh<sup>b</sup>, Ramin Jannesar<sup>c,d</sup>***

*<sup>a</sup> Chemistry Department, Yasouj University, Yasouj 75918-74831, Iran, Tel. /fax: +98-74-33223048*

*<sup>b</sup> Department of Gas and Petroleum, Yasouj University, Gachsaran 75918-74831, Iran*

*<sup>c</sup> Department of Biotechnology and Microbial Nanotechnology, Dena pathobiology laboratory, Yasuj, IR Iran*

*<sup>d</sup> Department of Pathology, Yasuj University of Medical Sciences, Yasuj, IR Iran*

*Corresponding author:*

*\*E-Mail: [m\\_ghaedi@yu.ac.ir](mailto:m_ghaedi@yu.ac.ir)*

**Table S1.** Experimental factors and levels in the central composite design.

| Factor | Name                | Units | Minimum | Maximum | Coded | Values       | Mean            |              |                 |
|--------|---------------------|-------|---------|---------|-------|--------------|-----------------|--------------|-----------------|
| A      | pH                  | -     | 3.00    | 9.00    | 4.50  | 7.50         | 6.00            |              |                 |
| B      | Photocatalyst mass  | g     | 0.008   | 0.016   | 0.010 | 0.014        | 0.012           |              |                 |
| C      | Irradiation Time    | min   | 60.00   | 120.00  | 75.00 | 105.00       | 90.0            |              |                 |
| D      | Concentration of MG | mg/L  | 4.00    | 12.00   | 6.00  | 10.00        | 8.00            |              |                 |
| E      | Concentration of AO | mg/L  | 2.00    | 6.00    | 3.00  | 5.00         | 4.00            |              |                 |
| Run    | A                   | B     | C       | D       | E     | Actual R% MG | Predicted R% MG | Actual R% AO | Predicted R% AO |
| 1      | 4.5                 | 0.010 | 75.0    | 6.0     | 3.0   | 88.99        | 88.68           | 90.19        | 90.05           |
| 2      | 6.0                 | 0.012 | 90.0    | 8.0     | 4.0   | 87.62        | 86.89           | 82.32        | 81.91           |
| 3      | 6.0                 | 0.012 | 90.0    | 8.0     | 2.0   | 92.32        | 92.55           | 98.49        | 98.59           |
| 4      | 6.0                 | 0.016 | 90.0    | 8.0     | 4.0   | 96.8         | 97.03           | 94.66        | 94.76           |
| 5      | 9.0                 | 0.012 | 90.0    | 8.0     | 4.0   | 97.64        | 97.87           | 98.5         | 98.60           |
| 6      | 4.5                 | 0.014 | 75.0    | 10.0    | 5.0   | 90.91        | 90.75           | 91.4         | 91.33           |
| 7      | 6.0                 | 0.012 | 90.0    | 8.0     | 6.0   | 65.49        | 65.72           | 53.57        | 53.67           |
| 8      | 7.5                 | 0.014 | 75.0    | 6.0     | 5.0   | 87.53        | 87.37           | 93.01        | 92.94           |
| 9      | 6.0                 | 0.012 | 90.0    | 8.0     | 4.0   | 86.56        | 86.89           | 81.14        | 81.91           |
| 10     | 6.0                 | 0.008 | 90.0    | 8.0     | 4.0   | 80.62        | 80.85           | 66.76        | 66.86           |
| 11     | 6.0                 | 0.012 | 90.0    | 4.0     | 4.0   | 93.47        | 93.70           | 94.13        | 94.23           |
| 12     | 7.5                 | 0.010 | 75.0    | 10.0    | 5.0   | 89.54        | 89.38           | 90.88        | 90.81           |
| 13     | 6.0                 | 0.012 | 90.0    | 8.0     | 4.0   | 87.25        | 86.89           | 82.44        | 81.91           |
| 14     | 7.5                 | 0.010 | 105.0   | 6.0     | 5.0   | 96.36        | 96.20           | 95.64        | 95.57           |
| 15     | 6.0                 | 0.012 | 60.0    | 8.0     | 4.0   | 73.18        | 73.41           | 73.75        | 73.85           |
| 16     | 4.5                 | 0.010 | 105.0   | 10.0    | 5.0   | 59.71        | 59.55           | 65.4         | 65.33           |
| 17     | 7.5                 | 0.010 | 105.0   | 10.0    | 3.0   | 97.17        | 97.01           | 91.39        | 91.32           |
| 18     | 6.0                 | 0.012 | 120.0   | 8.0     | 4.0   | 94.27        | 94.50           | 93.71        | 93.81           |
| 19     | 7.5                 | 0.014 | 75.0    | 10.0    | 3.0   | 80.08        | 79.92           | 81.54        | 81.47           |
| 20     | 7.5                 | 0.014 | 105.0   | 6.0     | 3.0   | 69.06        | 68.90           | 68.52        | 68.45           |
| 21     | 6.0                 | 0.012 | 90.0    | 12.0    | 4.0   | 65.50        | 65.73           | 84.64        | 84.74           |
| 22     | 6.0                 | 0.012 | 90.0    | 8.0     | 4.0   | 86.95        | 86.89           | 81.62        | 81.91           |
| 23     | 4.5                 | 0.014 | 105.0   | 6.0     | 5.0   | 79.13        | 78.97           | 66.02        | 65.95           |
| 24     | 4.5                 | 0.014 | 105.0   | 10.0    | 3.0   | 75.58        | 75.42           | 89.49        | 89.42           |
| 25     | 3.0                 | 0.012 | 90.0    | 8.0     | 4.0   | 79.38        | 79.61           | 79.71        | 79.81           |
| 26     | 6.0                 | 0.012 | 90.0    | 8.0     | 4.0   | 86.54        | 86.89           | 82.22        | 81.91           |

**Table S2.** Sequential Model Sum of Squares for MG degradation.

| <b>R% MG</b>                           |                       |                  |                           |                            |                            |           |
|----------------------------------------|-----------------------|------------------|---------------------------|----------------------------|----------------------------|-----------|
| <b>Sequential Model Sum of Squares</b> |                       |                  |                           |                            |                            |           |
| <b>Source</b>                          | <b>Sum of Squares</b> | <b>df</b>        | <b>Mean Square</b>        | <b>F Value</b>             | <b>p-value Prob &gt; F</b> |           |
| Mean                                   | 1.841E+005            | 1                | 1.841E+005                |                            |                            |           |
| Linear                                 | 644.09                | 5                | 128.82                    | 1.16                       | 0.3613                     |           |
| 2FI                                    | 1993.40               | 10               | 199.34                    | 9.00                       | 0.0009                     |           |
| Quadratic                              | 219.77                | 5                | 43.95                     | 122.61                     | < 0.0001                   | Suggested |
| Cubic                                  | 0.94                  | 1                | 0.94                      | 4.40                       | 0.1039                     | Aliased   |
| Residual                               | 0.85                  | 4                | 0.21                      |                            |                            |           |
| Total                                  | 1.869E+005            | 26               | 7189.57                   |                            |                            |           |
| <b>Lack of Fit Tests</b>               |                       |                  |                           |                            |                            |           |
| <b>Source</b>                          | <b>Sum of Squares</b> | <b>df</b>        | <b>Mean Square</b>        | <b>F Value</b>             | <b>p-value Prob &gt; F</b> |           |
| Linear                                 | 2214.10               | 16               | 138.38                    | 648.67                     | < 0.0001                   |           |
| 2FI                                    | 220.70                | 6                | 36.78                     | 172.43                     | < 0.0001                   |           |
| Quadratic                              | 0.94                  | 1                | 0.94                      | 4.40                       | 0.1039                     | Suggested |
| Cubic                                  | 0.000                 | 0                |                           |                            |                            | Aliased   |
| Pure Error                             | 0.85                  | 4                | 0.21                      |                            |                            |           |
| <b>Model Summary Statistics</b>        |                       |                  |                           |                            |                            |           |
| <b>Source</b>                          | <b>Std. Dev.</b>      | <b>R-Squared</b> | <b>Adjusted R-Squared</b> | <b>Predicted R-Squared</b> | <b>PRESS</b>               |           |
| Linear                                 | 10.52                 | 0.2253           | 0.0316                    | -0.4563                    | 4163.57                    |           |
| 2FI                                    | 4.71                  | 0.9225           | 0.8063                    | -0.2081                    | 3454.03                    |           |
| Quadratic                              | 0.60                  | 0.9994           | 0.9969                    | 0.8147                     | 529.84                     | Suggested |
| Cubic                                  | 0.46                  | 0.9997           | 0.9981                    |                            | +                          | Aliased   |

**Table S3.** Methods used to select the appropriate model for analyzing of input data.

| <b>R% AO</b>                           |                       |                  |                           |                            |                            |           |
|----------------------------------------|-----------------------|------------------|---------------------------|----------------------------|----------------------------|-----------|
| <b>Sequential Model Sum of Squares</b> |                       |                  |                           |                            |                            |           |
| <b>Source</b>                          | <b>Sum of Squares</b> | <b>df</b>        | <b>Mean Square</b>        | <b>F Value</b>             | <b>p-value Prob &gt; F</b> |           |
| Mean vs Total                          | 1.813E+005            | 1                | 1.813E+005                |                            |                            |           |
| Linear vs Mean                         | 741.03                | 5                | 148.21                    | 1.09                       | 0.3942                     |           |
| 2FI vs Linear                          | 2428.15               | 10               | 242.82                    | 8.63                       | 0.0011                     |           |
| Quadratic vs 2FI                       | 279.91                | 5                | 55.98                     | 200.50                     | < 0.0001                   | Suggested |
| Cubic vs Quadratic                     | 0.18                  | 1                | 0.18                      | 0.60                       | 0.4830                     | Aliased   |
| Residual                               | 1.21                  | 4                | 0.30                      |                            |                            |           |
| Total                                  | 1.848E+005            | 26               | 7105.86                   |                            |                            |           |
| <b>Lack of Fit Tests</b>               |                       |                  |                           |                            |                            |           |
| <b>Source</b>                          | <b>Sum of Squares</b> | <b>df</b>        | <b>Mean Square</b>        | <b>F Value</b>             | <b>p-value Prob &gt; F</b> |           |
| Linear                                 | 2708.24               | 16               | 169.27                    | 557.31                     | < 0.0001                   |           |
| 2FI                                    | 280.09                | 6                | 46.68                     | 153.70                     | 0.0001                     |           |
| Quadratic                              | 0.18                  | 1                | 0.18                      | 0.60                       | 0.4830                     | Suggested |
| Cubic                                  | 0.000                 | 0                |                           |                            |                            | Aliased   |
| Pure Error                             | 1.21                  | 4                | 0.30                      |                            |                            |           |
| <b>Model Summary Statistics</b>        |                       |                  |                           |                            |                            |           |
| <b>Source</b>                          | <b>Std. Dev.</b>      | <b>R-Squared</b> | <b>Adjusted R-Squared</b> | <b>Predicted R-Squared</b> | <b>PRESS</b>               |           |
| Linear                                 | 11.64                 | 0.2148           | 0.0185                    | -0.4884                    | 5135.55                    |           |
| 2FI                                    | 5.30                  | 0.9185           | 0.7962                    | -0.0763                    | 3713.67                    |           |
| Quadratic                              | 0.53                  | 0.9996           | 0.9980                    | 0.9699                     | 103.82                     | Suggested |
| Cubic                                  | 0.55                  | 0.9996           | 0.9978                    |                            | +                          | Aliased   |

**Table S4.** Analysis of variance (ANOVA) results for quadratic model of degradation process.

| Source                | df       | R% of MG       |               |                |                     | R% of AO       |                |                |                     |
|-----------------------|----------|----------------|---------------|----------------|---------------------|----------------|----------------|----------------|---------------------|
|                       |          | Sum of Squares | Mean Square   | F Value        | p-value<br>Prob > F | Sum of Squares | Mean Square    | F Value        | p-value<br>Prob > F |
| Model                 | 20       | 2857.25        | 142.86        | 398.54         | < 0.0001            | 3449.09        | 172.45         | 617.66         | < 0.0001            |
| <i>A</i>              | <i>1</i> | <i>166.71</i>  | <i>166.71</i> | <i>465.08</i>  | <i>&lt; 0.0001</i>  | <i>176.53</i>  | <i>176.53</i>  | <i>632.27</i>  | <i>&lt; 0.0001</i>  |
| <i>B</i>              | <i>1</i> | <i>130.90</i>  | <i>130.90</i> | <i>365.16</i>  | <i>&lt; 0.0001</i>  | <i>389.20</i>  | <i>389.20</i>  | <i>1393.97</i> | <i>&lt; 0.0001</i>  |
| <i>C</i>              | <i>1</i> | <i>222.39</i>  | <i>222.39</i> | <i>620.41</i>  | <i>&lt; 0.0001</i>  | <i>199.20</i>  | <i>199.20</i>  | <i>713.46</i>  | <i>&lt; 0.0001</i>  |
| <i>D</i>              | <i>1</i> | <i>391.16</i>  | <i>391.16</i> | <i>1091.21</i> | <i>&lt; 0.0001</i>  | <i>45.03</i>   | <i>45.03</i>   | <i>161.28</i>  | <i>&lt; 0.0001</i>  |
| <i>E</i>              | <i>1</i> | <i>359.92</i>  | <i>359.92</i> | <i>1004.07</i> | <i>&lt; 0.0001</i>  | <i>1008.90</i> | <i>1008.90</i> | <i>3613.48</i> | <i>&lt; 0.0001</i>  |
| <i>AB</i>             | <i>1</i> | <i>388.47</i>  | <i>388.47</i> | <i>1083.70</i> | <i>&lt; 0.0001</i>  | <i>433.35</i>  | <i>433.35</i>  | <i>1552.08</i> | <i>&lt; 0.0001</i>  |
| <i>AC</i>             | <i>1</i> | <i>100.77</i>  | <i>100.77</i> | <i>281.11</i>  | <i>&lt; 0.0001</i>  | <i>130.35</i>  | <i>130.35</i>  | <i>466.88</i>  | <i>&lt; 0.0001</i>  |
| <i>AD</i>             | <i>1</i> | <i>209.62</i>  | <i>209.62</i> | <i>584.78</i>  | <i>&lt; 0.0001</i>  | <i>35.30</i>   | <i>35.30</i>   | <i>126.43</i>  | <i>&lt; 0.0001</i>  |
| <i>AE</i>             | <i>1</i> | <i>289.34</i>  | <i>289.34</i> | <i>807.18</i>  | <i>&lt; 0.0001</i>  | <i>869.47</i>  | <i>869.47</i>  | <i>3114.09</i> | <i>&lt; 0.0001</i>  |
| <i>BC</i>             | <i>1</i> | <i>726.33</i>  | <i>726.33</i> | <i>2026.21</i> | <i>&lt; 0.0001</i>  | <i>907.22</i>  | <i>907.22</i>  | <i>3249.29</i> | <i>&lt; 0.0001</i>  |
| <i>BD</i>             | <i>1</i> | <i>37.55</i>   | <i>37.55</i>  | <i>104.76</i>  | <i>0.0002</i>       | <i>1.24</i>    | <i>1.24</i>    | <i>4.43</i>    | <i>0.0891</i>       |
| <i>BE</i>             | <i>1</i> | <i>113.78</i>  | <i>113.78</i> | <i>317.42</i>  | <i>&lt; 0.0001</i>  | <i>141.56</i>  | <i>141.56</i>  | <i>507.01</i>  | <i>&lt; 0.0001</i>  |
| <i>CD</i>             | <i>1</i> | <i>6.90</i>    | <i>6.90</i>   | <i>19.25</i>   | <i>0.0071</i>       | <i>7.11</i>    | <i>7.11</i>    | <i>25.47</i>   | <i>0.0039</i>       |
| <i>CE</i>             | <i>1</i> | <i>3.57</i>    | <i>3.57</i>   | <i>9.97</i>    | <i>0.0252</i>       | <i>22.99</i>   | <i>22.99</i>   | <i>82.35</i>   | <i>0.0003</i>       |
| <i>DE</i>             | <i>1</i> | <i>527.89</i>  | <i>527.89</i> | <i>1472.64</i> | <i>&lt; 0.0001</i>  | <i>775.26</i>  | <i>775.26</i>  | <i>2776.65</i> | <i>&lt; 0.0001</i>  |
| <i>A</i> <sup>2</sup> | <i>1</i> | <i>5.88</i>    | <i>5.88</i>   | <i>16.41</i>   | <i>0.0098</i>       | <i>91.15</i>   | <i>91.15</i>   | <i>326.47</i>  | <i>&lt; 0.0001</i>  |
| <i>B</i> <sup>2</sup> | <i>1</i> | <i>7.22</i>    | <i>7.22</i>   | <i>20.14</i>   | <i>0.0065</i>       | <i>2.04</i>    | <i>2.04</i>    | <i>7.32</i>    | <i>0.0425</i>       |
| <i>C</i> <sup>2</sup> | <i>1</i> | <i>14.68</i>   | <i>14.68</i>  | <i>40.95</i>   | <i>0.0014</i>       | <i>6.35</i>    | <i>6.35</i>    | <i>22.73</i>   | <i>0.0050</i>       |
| <i>D</i> <sup>2</sup> | <i>1</i> | <i>87.90</i>   | <i>87.90</i>  | <i>245.22</i>  | <i>&lt; 0.0001</i>  | <i>98.28</i>   | <i>98.28</i>   | <i>351.99</i>  | <i>&lt; 0.0001</i>  |
| <i>E</i> <sup>2</sup> | <i>1</i> | <i>102.70</i>  | <i>102.70</i> | <i>286.50</i>  | <i>&lt; 0.0001</i>  | <i>57.00</i>   | <i>57.00</i>   | <i>204.13</i>  | <i>&lt; 0.0001</i>  |
| Residual              | 5        | 1.79           | 0.36          |                |                     | 1.40           | 0.28           |                |                     |
| <i>Lack of Fit</i>    | <i>1</i> | <i>0.94</i>    | <i>0.94</i>   | <i>4.40</i>    | <i>0.1039</i>       | <i>0.18</i>    | <i>0.18</i>    | <i>0.60</i>    | <i>0.4830</i>       |
| <i>Pure Error</i>     | <i>4</i> | <i>0.85</i>    | <i>0.21</i>   |                |                     | <i>1.21</i>    | <i>0.30</i>    |                |                     |
| Cor Total             | 25       | 2859.05        |               |                |                     | 3450.49        |                |                |                     |

**Table S5.** Statistical supplementary results of quadratic model.

|                          | <b>R% AO</b> | <b>R% MG</b> |
|--------------------------|--------------|--------------|
| <b>Std. Dev.</b>         | 0.60         | 0.53         |
| <b>Mean</b>              | 84.14        | 83.51        |
| <b>C.V. %</b>            | 0.71         | 0.63         |
| <b>PRESS</b>             | 529.84       | 103.82       |
| <b>-2 Log Likelihood</b> | 4.25         | -2.25        |
| <b>R-Squared</b>         | 0.9994       | 0.9996       |
| <b>Adj R-Squared</b>     | 0.9969       | 0.9980       |
| <b>Pred R-Squared</b>    | 0.8147       | 0.9699       |
| <b>Adeq Precision</b>    | 71.219       | 94.613       |
| <b>BIC</b>               | 72.67        | 66.17        |
| <b>AICc</b>              | 277.25       | 270.75       |
